# Supplementary material for: Acceptability and Feasibility of Best Practice School Lunches by Elementary School-Aged Children in a Serve Setting: A Randomized Crossover Trial
Source: MDPI journal article supplement (doi:10.3390/ijerph17176299), 2020-08-29
Supplement: s1 [file s1]

**Figure S1.** Sample taste test survey

### **Taste Test Survey**

Color in the smiley face that best describes how you feel about the meal that you are tasting!

What do you think of the color/look of this meal?

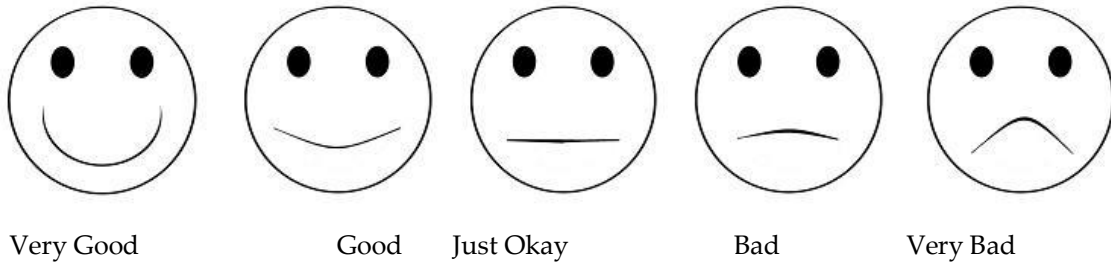

What do you think of the taste/ flavor of this meal?

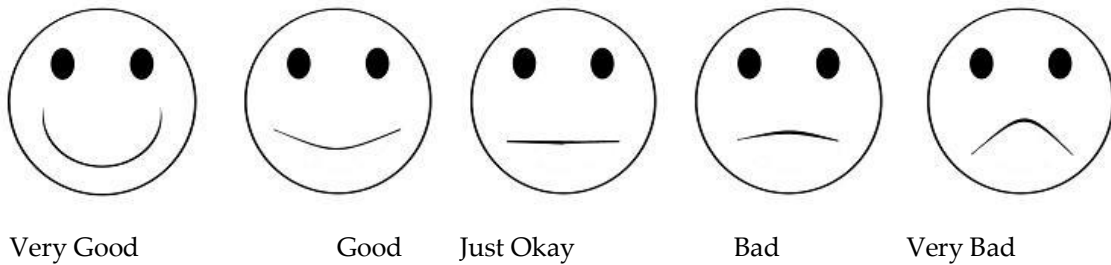

What do you think of the smell of this meal?

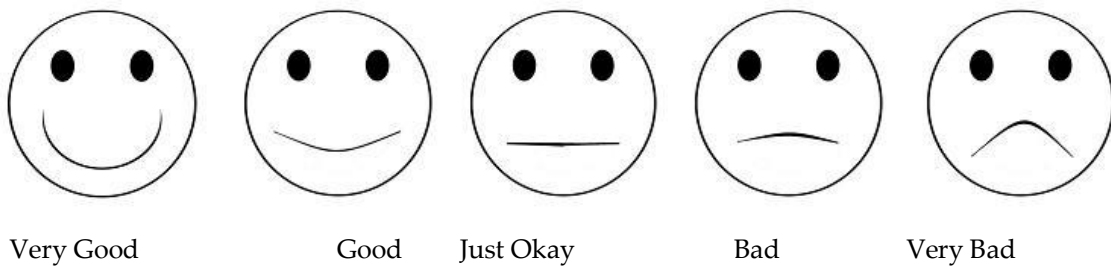

Do you think we should serve this meal on the lunch menu?

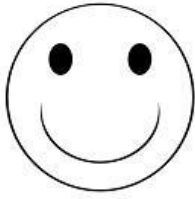

Very Good

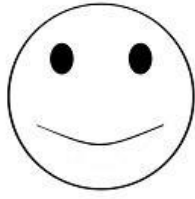

Good

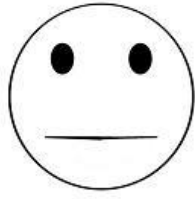

Just Okay

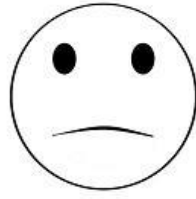

Bad

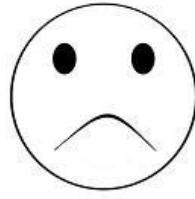

Very Bad

Any comments?

---

---

**Thank you for tasting!**

**Table S1.** Summary and comparison of taste test acceptability of individual meals and meal types

| Meal                      | Taste Score <sup>^</sup> | Smell Score <sup>^</sup> | Appearance Score <sup>^</sup> | Serve at School Score <sup>^</sup> | Total Score <sup>~</sup> |
|---------------------------|--------------------------|--------------------------|-------------------------------|------------------------------------|--------------------------|
| Mean ± Standard Deviation |                          |                          |                               |                                    |                          |
| BPSL1 (MC1)               | 4.1±0.9                  | 3.8±1.3                  | 4.3±0.7                       | 4.5±1.0                            | 16.7±3.1                 |
| BPSL2 (MC1)               | 4.6±0.6                  | 4.3±0.8                  | 4.4±0.8                       | 4.2±1.0                            | 17.5±2.4                 |
| BPSL (MC3)                | 4.2±0.8                  | 4.3±0.8                  | 3.8±1.0                       | 4.2±1.0                            | 16.5±2.7                 |
| Overall BPSL              | 4.4±0.7                  | 4.2±1.0                  | 4.3±0.8                       | 4.3±1.0                            | 17.2±2.6                 |
| TSL1 (MC2)                | 4.7±0.5                  | 3.7±1.1                  | 4.1±0.9                       | 4.0±1.4                            | 16.6±3.6                 |
| TLS2 (MC2)                | 4.7±0.5                  | 4.3±0.9                  | 4.4±0.7                       | 4.6±0.7                            | 18.0±2.2                 |
| TSL (MC3)                 | 4.4±0.7                  | 4.3±0.9                  | 4.3±0.8                       | 4.4±0.8                            | 17.4±2.4                 |
| Overall TSL               | 4.6±0.6                  | 4.3±0.9                  | 4.4±0.7                       | 4.5±0.8                            | 17.7±2.3                 |

\*MC = meal condition

<sup>+</sup>[pre-meal hunger score (out of 5)] – [post-meal hunger score (out of 5)]

<sup>^</sup>Maximum score of 5

<sup>~</sup>Maximum score of 20

\*\*Significant difference ( $p < 0.017$  for total taste test score and average total plate waste,  $p < 0.006$  for taste test score subcomponents and meal component plate waste), after adjusting for sex, grade level, BMI percentile, and meal group

**Table S2.** Summary and comparison of plate waste acceptability of individual meals and meal types

| Meal                             | Fruit Waste     | Vegetable Waste | Grain Waste     | Protein Waste   | Milk Waste      | Average Total Meal Waste |
|----------------------------------|-----------------|-----------------|-----------------|-----------------|-----------------|--------------------------|
| %, Mean $\pm$ Standard Deviation |                 |                 |                 |                 |                 |                          |
| BPSL1 (MC1)                      | 4.7 $\pm$ 11.7  | 81.8 $\pm$ 27.3 | 49.1 $\pm$ 43.6 | 54.3 $\pm$ 33.3 | 72.7 $\pm$ 33.7 | 52.5 $\pm$ 13.0          |
| BPSL2 (MC1)                      | 47.2 $\pm$ 40.1 | 72.9 $\pm$ 28.4 | 28.4 $\pm$ 33.1 | 28.4 $\pm$ 33.1 | 60.9 $\pm$ 44.9 | 47.6 $\pm$ 19.2          |
| BPSL (MC3)                       | 61.6 $\pm$ 40.7 | 76.2 $\pm$ 26.4 | 27.0 $\pm$ 36.8 | 26.7 $\pm$ 37.5 | 71.6 $\pm$ 39.1 | 52.6 $\pm$ 20.8          |
| Overall BPSL                     | 39.1 $\pm$ 40.2 | 75.5 $\pm$ 27.5 | 33.1 $\pm$ 36.5 | 34.3 $\pm$ 34.8 | 65.3 $\pm$ 41.2 | 49.5 $\pm$ 17.9          |
| TSL1 (MC2)                       | 50.6 $\pm$ 47.8 | 94.6 $\pm$ 6.2  | 45.2 $\pm$ 46.7 | 18.5 $\pm$ 34.4 | 91.5 $\pm$ 21.3 | 60.1 $\pm$ 16.9          |
| TLS2 (MC2)                       | 51.7 $\pm$ 38.1 | 70.7 $\pm$ 29.4 | 34.7 $\pm$ 40.2 | 34.7 $\pm$ 40.2 | 68.2 $\pm$ 40.7 | 52.0 $\pm$ 21.7          |
| TSL (MC3)                        | 45.0 $\pm$ 41.2 | 35.4 $\pm$ 36.4 | 37.5 $\pm$ 36.8 | 26.6 $\pm$ 35.6 | 61.8 $\pm$ 45.2 | 41.2 $\pm$ 21.6          |
| Overall TSL                      | 48.5 $\pm$ 40.3 | 56.8 $\pm$ 37.9 | 36.4 $\pm$ 38.7 | 28.3 $\pm$ 36.8 | 68.8 $\pm$ 41.3 | 47.8 $\pm$ 22.1          |

\*MC = meal condition

\*\*Significant difference ( $p < 0.017$  for total taste test score and average total plate waste,  $p < 0.006$  for taste test score subcomponents and meal component plate waste), after adjusting for sex, grade level, BMI percentile, and meal group

**Table S3.** Stated reasons for meal choices in meal condition 1 (2 BPSL\*)

| Participant | Meal Chosen | Reason Meal Selected Was Chosen     | Reason Meal Not Selected Was Not Chosen |
|-------------|-------------|-------------------------------------|-----------------------------------------|
| 001         | BPSL1       | Like the fruit and vegetable        | Like the other one better               |
| 002         | BPSL2       | Pizza is my favorite                | Don't like cornbread                    |
| 003         | BPSL2       | Love pizza, just want pizza         | Love cornbread, just want pizza         |
| 004         | BPSL1       | Like broccoli                       | Didn't want salad                       |
| 005         | BPSL2       | Like oranges                        | Not feeling the nuggets today           |
| 006         | BPSL1       | Like cornbread and nuggets          | Don't like salad and messy oranges      |
| 007         | BPSL1       | Like broccoli                       | Don't like cucumber                     |
| 008         | BPSL2       | I really like pizza                 | Broccoli                                |
| 010         | BPSL2       | Like pizza, lettuce, and cucumbers  | Not a fan of broccoli                   |
| 012         | BPSL2       | Love pizza and oranges              | Don't like broccoli and raisins         |
| 014         | BPSL2       | It looks good                       | There's stuff in the broccoli           |
| 015         | BPSL2       | Like pizza                          | Don't like broccoli                     |
| 016         | BPSL2       | Like pizza                          | No reason                               |
| 017         | BPSL2       | Don't like broccoli                 | Don't like broccoli                     |
| 018         | BPSL2       | No reason                           | More not like                           |
| 019         | BPSL2       | Like salad                          | Don't like broccoli with ranch          |
| 020         | BPSL2       | Pizza and orange                    | No reason                               |
| 021         | BPSL2       | The chicken looks different         | Chicken nuggets looked strange          |
| 022         | BPSL2       | Like pizza                          | Don't like grapes                       |
| 023         | BPSL2       | Really like pizza                   | Broccoli does not agree with me         |
| 024         | BPSL2       | Doesn't like dressing               | There was dressing on the broccoli      |
| 025         | BPSL1       | Like cornbread                      | No reason                               |
| 026         | BPSL1       | Like chicken and grapes             | No reason                               |
| 027         | BPSL2       | Really like pizza and cutie         | Not like broccoli                       |
| 028         | BPSL2       | Want pizza                          | Not like nuggets                        |
| 029         | BPSL1       | Like bread                          | Not feeling pizza                       |
| 030         | BPSL2       | Don't like other meal               | Didn't like chicken and broccoli        |
| 031         | BPSL1       | Like nuggets, grapes, and cornbread | Don't like the vegetable                |
| 033         | BPSL2       | Like pizza                          | Don't like cornbread                    |
| 034         | BPSL2       | Last time had nuggets               | Last time had nuggets                   |
| 035         | BPSL2       | Pizza, orange, and cucumber         | Broccoli                                |
| 036         | BPSL1       | Like cornbread and grapes           | Don't like oranges                      |
| 037         | BPSL1       | Like chicken                        | Like chicken                            |
| 038         | BPSL2       | Like salad                          | No reason                               |
| 040         | BPSL2       | Likes pizza more                    | Only like some chicken                  |
| 041         | BPSL2       | Like most stuff                     | Don't know                              |

\*BPSL1 = Oven baked chicken nuggets, broccoli salad, grapes, whole grain cornbread, low-fat milk

BPSL2 = Whole grain cheese pizza, side salad with Italian dressing, clementine, low-fat milk

**Table S4.** Stated reasons for meal choices in meal condition 2 (2 TSL<sup>+</sup>)

| Participant | Meal Chosen | Reason Meal Selected Was Chosen         | Reason Meal Not Selected Was Not Chosen          |
|-------------|-------------|-----------------------------------------|--------------------------------------------------|
| 001         | TSL1        | The pizza will make me too full         | The pizza will make me too full                  |
| 002         | TSL2        | Like pizza                              | Don't like pineapple                             |
| 003         | TSL2        | Pizza is my favorite                    | Pizza is my favorite                             |
| 004         | TSL1        | Like nuggets                            | Like pizza, just didn't want it                  |
| 005         | TSL2        | Like oranges                            | Don't like pineapple                             |
| 006         | TSL2        | Like pizza                              | Like pizza                                       |
| 007         | TSL2        | Not sure                                | Didn't want chicken                              |
| 008         | TSL2        | Like pizza                              | Don't like broccoli                              |
| 010         | TSL2        | Like pizza                              | Don't like cheesy broccoli or packaged pineapple |
| 012         | TSL2        | Just really like pizza                  | Don't like cheesy broccoli and ketchup           |
| 013         | TSL2        | Like pizza                              | Don't like cheese on broccoli                    |
| 014         | TSL2        | Like pizza                              | Like pizza                                       |
| 015         | TSL2        | Like pizza                              | Don't like chicken much                          |
| 016         | TSL2        | Like pizza                              | Like pizza                                       |
| 017         | TSL2        | Like pizza                              | Don't like broccoli                              |
| 018         | TSL2        | Looks better                            | The other one looks better                       |
| 019         | TSL2        | Like pizza and ranch                    | Don't want a roll                                |
| 020         | TSL2        | Like carrots and pizza                  | Like carrots and pizza                           |
| 021         | TSL2        | Could smell pizza                       | Broccoli looks "eh"                              |
| 022         | TSL2        | Like carrots                            | Don't like chicken                               |
| 023         | TSL2        | Like the whole tray                     | Not comfortable with broccoli                    |
| 024         | TSL1        | Hungry                                  | Don't like ranch                                 |
| 025         | TSL1        | Like nuggets better                     | Like nuggets                                     |
| 026         | TSL2        | Like pizza, carrots, ranch, and oranges | Don't like broccoli                              |
| 027         | TSL2        | Like pizza                              | Like pizza more                                  |
| 028         | TSL2        | Like pizza                              | No reason                                        |
| 029         | TSL1        | Not in the mood for pizza               | Not in the mood for pizza                        |
| 030         | TSL2        | Like pizza and fruit cup a lot          | Don't like pineapples                            |
| 031         | TSL2        | Like pizza                              | Like pizza                                       |
| 033         | TSL2        | Like oranges and carrots                | No reason                                        |
| 034         | TSL1        | Like chicken                            | Don't know                                       |
| 035         | TSL2        | Like pizza                              | Don't like broccoli                              |
| 036         | TSL2        | Like oranges                            | Don't like broccoli                              |
| 037         | TSL2        | Want pizza                              | Want pizza                                       |
| 038         | TSL1        | Like this one                           | Had that one last time                           |
| 040         | TSL2        | More vegetarian                         | Other one more vegetarian                        |
| 041         | TSL2        | Like pizza and fruit                    | Like pizza and fruit                             |

\*TSL1 = Chicken nuggets, broccoli with cheese sauce, pineapple fruit cup, dinner roll, low-fat milk

TSL2 = Cheese pizza, carrots with ranch, mandarin oranges, low-fat milk

**Table S5.** Stated reasons for meal choices in meal condition 3 (1 BPSL, 1 TSL<sup>^</sup>)

| Participant | Meal Chosen | Reason Meal Selected Was Chosen              | Reason Meal Not Selected Was Not Chosen           |
|-------------|-------------|----------------------------------------------|---------------------------------------------------|
| 001         | TSL         | Like fruit cup                               | Usually don't eat that much food                  |
| 002         | TSL         | Like fries                                   | Hate coleslaw                                     |
| 003         | BPSL        | Don't like hotdogs                           | Don't like hotdogs                                |
| 004         | TSL         | Like fries                                   | No reason                                         |
| 005         | TSL         | Like hotdogs, fries, and ketchup             | Don't like pork                                   |
| 006         | BPSL        | Like pork and BBQ                            | Don't like messy fruit cup                        |
| 007         | TSL         | Don't like salad much                        | Don't like salad much                             |
| 008         | TSL         | Don't like coleslaw, love hotdogs            | Don't like coleslaw                               |
| 010         | TSL         | Like hotdog                                  | No reason                                         |
| 012         | TSL         | Like hotdog                                  | Don't like pork                                   |
| 014         | TSL         | Like French fries and peaches                | Stuff in the bun looks weird                      |
| 015         | BPSL        | Like food on that tray – salad, apples       | Don't like peaches                                |
| 016         | TSL         | Like hotdog                                  | No reason                                         |
| 017         | TSL         | Don't want apples                            | Don't like apples                                 |
| 018         | TSL         | Don't like salad                             | Don't like salad                                  |
| 019         | BPSL        | Like the sandwiches                          | Don't like hotdogs                                |
| 020         | TSL         | Like hotdog                                  | Don't like it                                     |
| 021         | TSL         | Not much of a salad eater, like fries        | Don't like salad                                  |
| 022         | TSL         | Like peaches                                 | Like peaches                                      |
| 023         | TSL         | Like hotdogs, more used to hotdog than BBQ   | Looks a little strange                            |
| 024         | TSL         | Don't really like coleslaw                   | Too much food                                     |
| 025         | TSL         | Like hotdog, fries, and ketchup              | Don't like BBQ pork                               |
| 026         | TSL         | Really like hotdog and fruit cup             | Don't like BBQ                                    |
| 027         | TSL         | Like hotdog and less healthy                 | Not into the salad                                |
| 028         | TSL         | Only like the apples on the other tray       | Like more on other tray                           |
| 029         | BPSL        | Like coleslaw and apples                     | Don't like hotdogs                                |
| 030         | TSL         | Like hotdog and fries                        | Other plate too tiny                              |
| 031         | TSL         | Hotdogs are good                             | Don't like coleslaw or BBQ pork                   |
| 033         | TSL         | I don't know                                 | Don't like salad                                  |
| 034         | TSL         | Like hotdog and fries                        | Not into coleslaw                                 |
| 035         | TSL         | Like French fries                            | Don't like coleslaw                               |
| 036         | TSL         | Like hotdogs                                 | Don't like BBQ                                    |
| 037         | BPSL        | Like apples                                  | Don't want it                                     |
| 038         | TSL         | Love hotdogs                                 | If hotdogs weren't here, would eat the other meal |
| 039         | TSL         | Like ketchup                                 | Too much food                                     |
| 040         | TSL         | Like this one more but not sure about either | No reason                                         |
| 041         | TSL         | Like everything but fries                    | Like some but not all                             |

^BPSL = BBQ pulled pork on whole grain slider buns, Asian coleslaw, apple slices, low-fat milk

TSL = Hot dog on whole grain-rich bun, French fries, peach fruit cup, low-fat milk



**Table S6.** Taste test survey comments for meal condition 1 (2 BPSL\*)

| Participant | Meal Chosen | Comments                                                                                                                                                   |
|-------------|-------------|------------------------------------------------------------------------------------------------------------------------------------------------------------|
| 001         | BPSL1       | "A little bit like the chicken nuggets but not as much"                                                                                                    |
| 002         | BPSL2       | "No carrots and purple stuff in salad."                                                                                                                    |
| 003         | BPSL2       | "The pizzs is the Best"                                                                                                                                    |
| 004         | BPSL1       | none                                                                                                                                                       |
| 005         | BPSL2       | "Nope ☺"                                                                                                                                                   |
| 006         | BPSL1       | none                                                                                                                                                       |
| 007         | BPSL1       | "Liked grapes. The chicken is crunchy. The bread is soft."                                                                                                 |
| 008         | BPSL2       | none                                                                                                                                                       |
| 010         | BPSL2       | "Nope"                                                                                                                                                     |
| 012         | BPSL2       | "AWSOME"                                                                                                                                                   |
| 014         | BPSL2       | "pizza is good ip"                                                                                                                                         |
| 015         | BPSL2       | none                                                                                                                                                       |
| 016         | BPSL2       | none                                                                                                                                                       |
| 017         | BPSL2       | none                                                                                                                                                       |
| 018         | BPSL2       | none                                                                                                                                                       |
| 019         | BPSL2       | none                                                                                                                                                       |
| 020         | BPSL2       | none                                                                                                                                                       |
| 021         | BPSL2       | "The milk tastes like cheese. More cheese should be put on the pizza to prevent the sauce from going everywhere. Create a pepperoni option. I hate salad." |
| 022         | BPSL2       | "The food is good every time I come I leave whith a happy Belly."                                                                                          |
| 023         | BPSL2       | none                                                                                                                                                       |
| 024         | BPSL2       | "Nothing frozen or not homemade"                                                                                                                           |
| 025         | BPSL1       | none                                                                                                                                                       |
| 026         | BPSL1       | none                                                                                                                                                       |
| 027         | BPSL2       | none                                                                                                                                                       |
| 028         | BPSL2       | none                                                                                                                                                       |
| 029         | BPSL1       | "Realy good, awesome"                                                                                                                                      |
| 030         | BPSL2       | "Its good"                                                                                                                                                 |
| 031         | BPSL1       | none                                                                                                                                                       |
| 033         | BPSL2       | none                                                                                                                                                       |
| 034         | BPSL1       | "Pleas put it in my schools menu because are food is DESCUSTING D':)"                                                                                      |
| 035         | BPSL2       | none                                                                                                                                                       |
| 036         | BPSL1       | none                                                                                                                                                       |
| 037         | BPSL1       | none                                                                                                                                                       |
| 038         | BPSL2       | "It was good probably people who like Italian ranch would like it...pizza taste kinda like calzone."                                                       |
| 040         | BPSL2       | "I think on the salad it should have more dressing on it."                                                                                                 |
| 041         | BPSL2       | none                                                                                                                                                       |

\*BPSL1 = Oven baked chicken nuggets, broccoli salad, grapes, whole grain cornbread, low-fat milk

BPSL2 = Whole grain cheese pizza, side salad with Italian dressing, clementine, low-fat milk

**Table S7.** Taste test survey comments for meal condition 2 (2 TSL+)

| Participant | Meal Chosen | Comments                                                                                     |
|-------------|-------------|----------------------------------------------------------------------------------------------|
| 001         | TSL1        | "I don't know why But I tasted something in the chicken nuggets that I did not really like." |
| 002         | TSL2        | "The pizza was better than the circle pizza they serve at school"                            |
| 003         | TSL2        | "It is amazing. It is very good."                                                            |
| 004         | TSL1        | "NO BRocoi"                                                                                  |
| 005         | TSL2        | "Nope"                                                                                       |
| 006         | TSL2        | none                                                                                         |
| 007         | TSL2        | "I no how to make pissa"                                                                     |
| 008         | TSL2        | none                                                                                         |
| 010         | TSL2        | "NOPE"                                                                                       |
| 012         | TSL2        | "This was AWSOME!"                                                                           |
| 013         | TSL2        | none                                                                                         |
| 014         | TSL2        | "no."                                                                                        |
| 015         | TSL2        | none                                                                                         |
| 016         | TSL2        | none                                                                                         |
| 017         | TSL2        | none                                                                                         |
| 018         | TSL2        | "Petzza/all food at my school is taribel! I don't like red sas"                              |
| 019         | TSL2        | none                                                                                         |
| 020         | TSL2        | none                                                                                         |
| 021         | TSL2        | "Serve this pizza vs the last pizza"                                                         |
| 022         | TSL2        | "Thank's for the food"                                                                       |
| 023         | TSL2        | "The fruit bowl was a bit messy."                                                            |
| 024         | TSL1        | none                                                                                         |
| 025         | TSL1        | none                                                                                         |
| 026         | TSL2        | none                                                                                         |
| 027         | TSL2        | "I think it was Asume. PJ could we have pancakes next time."                                 |
| 028         | TSL2        | none                                                                                         |
| 029         | TSL1        | "Awesome"                                                                                    |
| 030         | TSL2        | none                                                                                         |
| 031         | TSL2        | "I really really like that" (to the pizza) "I like everything"                               |
| 033         | TSL2        | none                                                                                         |
| 034         | TSL1        | "soggy Brocily."                                                                             |
| 035         | TSL2        | "nope"                                                                                       |
| 036         | TSL2        | none                                                                                         |
| 037         | TSL2        | none                                                                                         |
| 038         | TSL1        | "No, not really."                                                                            |
| 040         | TSL2        | "I don't like ranch I like blue cheese I also dont like the oranges"                         |
| 041         | TSL2        | none                                                                                         |

\*TSL1 = Chicken nuggets, broccoli with cheese sauce, pineapple fruit cup, dinner roll, low-fat milk

TSL2 = Cheese pizza, carrots with ranch, mandarin oranges, low-fat milk

**Table S8.** Taste test survey comments for meal condition 3 (1 BPSL, 1 TSL<sup>^</sup>)

| Participant | Meal Chosen | Comments                                                                                                                                         |
|-------------|-------------|--------------------------------------------------------------------------------------------------------------------------------------------------|
| 001         | TSL         | none                                                                                                                                             |
| 002         | TSL         | "I would put the burgers with the fries."                                                                                                        |
| 003         | BPSL        | "the Berger are okay."                                                                                                                           |
| 004         | TSL         | none                                                                                                                                             |
| 005         | TSL         | "nope. The ketchup is a little sour and the fires are so good!"                                                                                  |
| 006         | BPSL        | none                                                                                                                                             |
| 007         | TSL         | none                                                                                                                                             |
| 008         | TSL         | "More sweets"                                                                                                                                    |
| 010         | TSL         | "No"                                                                                                                                             |
| 012         | TSL         | "AWSOME"                                                                                                                                         |
| 014         | TSL         | "My mom will plopobly wont be that mad at my choice because sometimes im allowed to have hotdogs"                                                |
| 015         | BPSL        | none                                                                                                                                             |
| 016         | TSL         | none                                                                                                                                             |
| 017         | TSL         | none                                                                                                                                             |
| 018         | TSL         | none                                                                                                                                             |
| 019         | BPSL        | "This was the best school lunch I have tasted."                                                                                                  |
| 020         | TSL         | none                                                                                                                                             |
| 021         | TSL         | "the fries are cold"                                                                                                                             |
| 022         | TSL         | "The food was really good."                                                                                                                      |
| 023         | TSL         | none                                                                                                                                             |
| 024         | TSL         | none                                                                                                                                             |
| 025         | TSL         | none                                                                                                                                             |
| 026         | TSL         | none                                                                                                                                             |
| 027         | TSL         | none                                                                                                                                             |
| 028         | TSL         | none                                                                                                                                             |
| 029         | BPSL        | none                                                                                                                                             |
| 030         | TSL         | none                                                                                                                                             |
| 031         | TSL         | none                                                                                                                                             |
| 033         | TSL         | none                                                                                                                                             |
| 034         | TSL         | "Peaches are little to soggy and slimy"                                                                                                          |
| 035         | TSL         | none                                                                                                                                             |
| 036         | TSL         | none                                                                                                                                             |
| 037         | BPSL        | none                                                                                                                                             |
| 038         | TSL         | "This meal was great I'm steel on the thought of very good I would love for this to be on the lunch menu at school. P.s. frys are a little cold" |
| 039         | TSL         | "The peaches are soggy"                                                                                                                          |
| 040         | TSL         | "I liked the sides but not the hotdog"                                                                                                           |
| 041         | TSL         | none                                                                                                                                             |

<sup>^</sup>BPSL = BBQ pulled pork on whole grain slider buns, Asian coleslaw, apple slices, low-fat milk

TSL = Hot dog on whole grain-rich bun, French fries, peach fruit cup, low-fat milk
